# Supplementary material
Source: HighWire-hosted journal article supplement (https://www.rcpjournals.org/highwire/filestream/7996/field_highwire_adjunct_files/0/Downes_S1.pdf)

## Supplementary figures

**Fig S1. Readmissions to any specialty for patients discharged from care of the elderly.** This is raw readmissions as a percentage of all admissions.

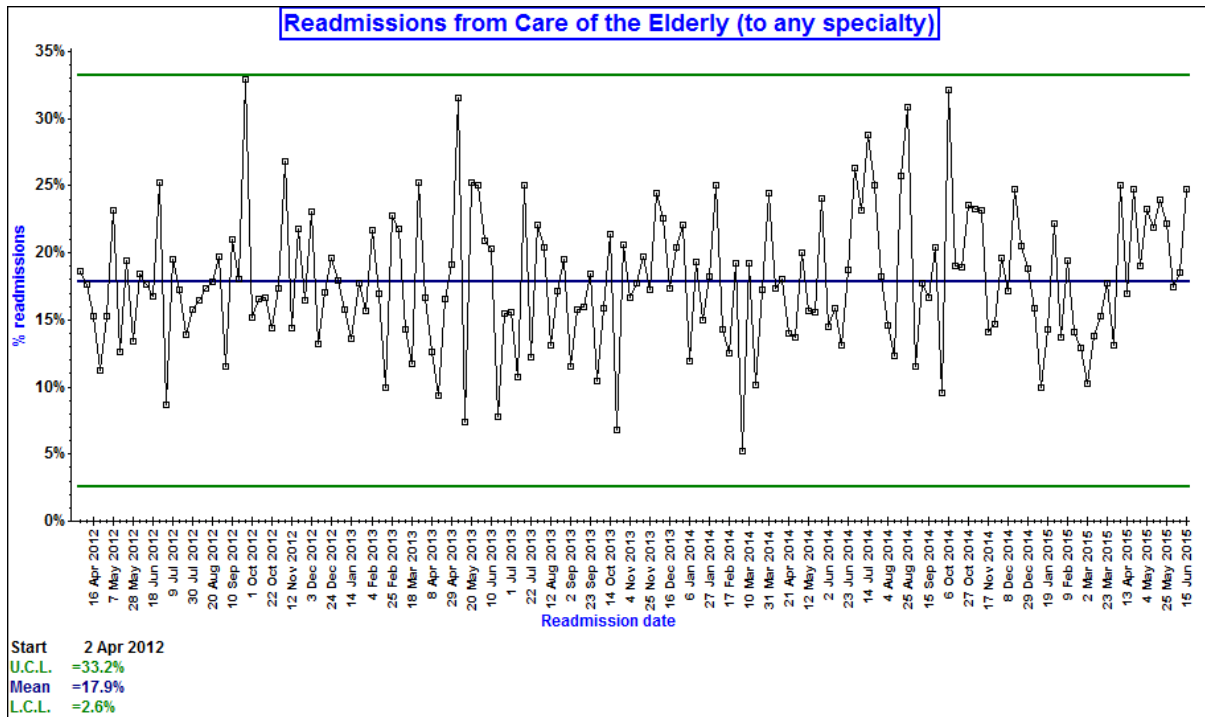

**Fig S2. Raw mortality (discharge destination = died) as a percentage of all discharges.** The extreme left of the chart shows the drop associated with the opening of the frailty unit. The special case rune (shown in green) is temporally associated with the influenza outbreak in the winter of 2014.

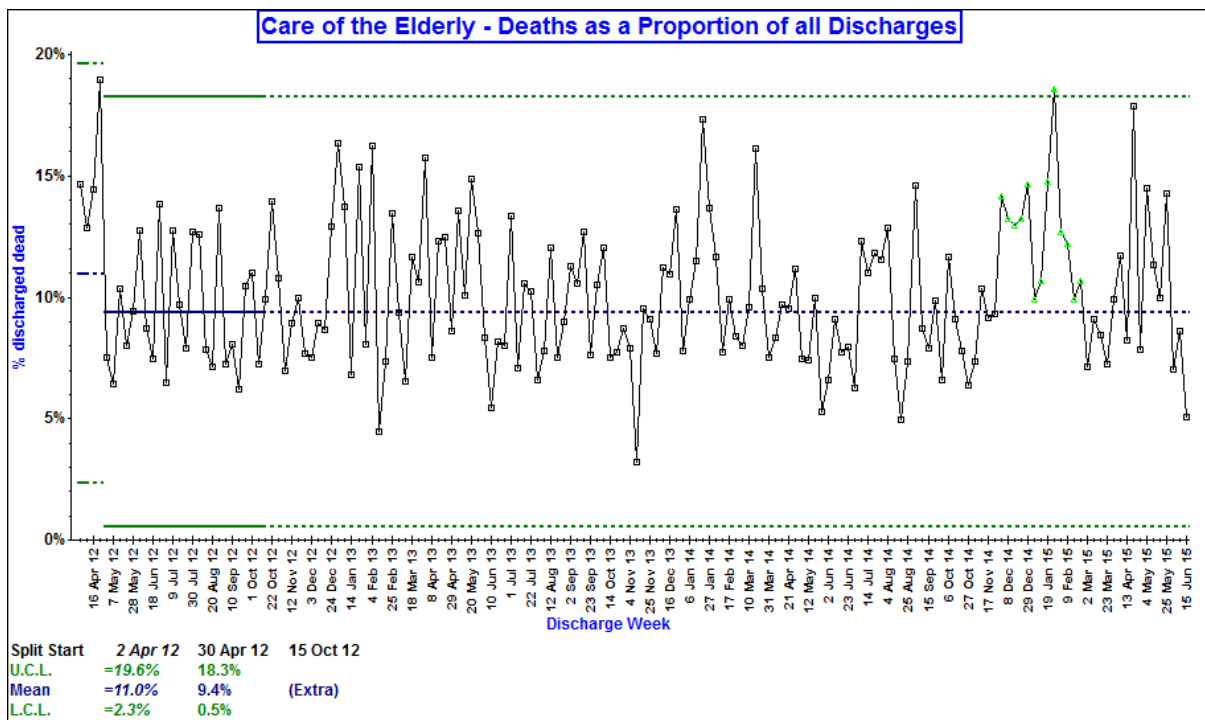

**Fig S3. Maximum recorded wait in any one week for a patient being discharged from a hospital bed into active recovery.** The minimum wait across the whole period was zero; except for week commencing 9/4/12 when the minimum was 3. Please note the chart splits have been set to match those in the main paper.

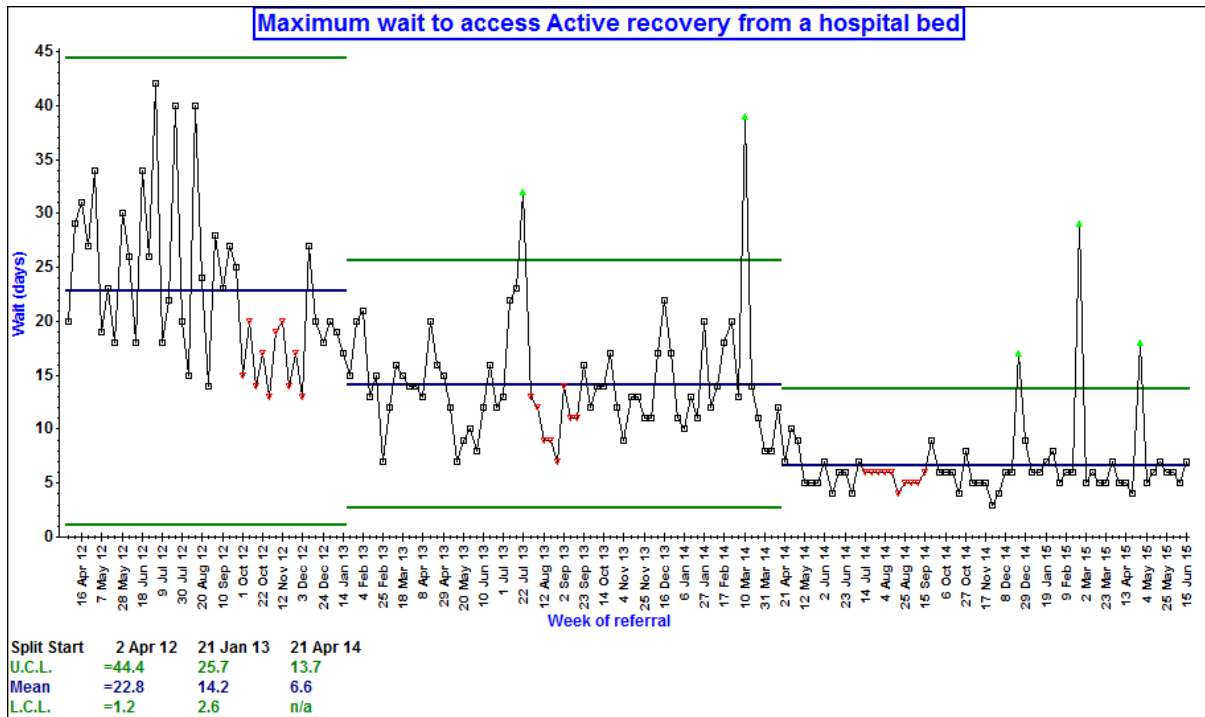

Supplement: Downes_S1.pdf [file Downes_S1.pdf]
